# Supplementary material for: Combining a lateral flow immunoassay with triplex loop-mediated isothermal amplification for the concurrent identification of three bovine diarrhea syndrome viruses
Source: Royal Society of Chemistry journal article supplement (doi:10.1039/d4ay01303d), 2024-01-01
Supplement: d4ay01303d1.pdf [file d4ay01303d1.pdf]

Supplementary Materials

**Combining a Lateral Flow Immunoassay with Triplex Loop-Mediated  
Isothermal Amplification for the Concurrent Identification of Three Bovine  
Diarrhea Syndrome Viruses**

**Table S1.** Sequences of LAMP primers for detecting BVDV, BRV, and BPV.

| Virus                  | Primer                | Sequence (5' to 3')                                      |
|------------------------|-----------------------|----------------------------------------------------------|
| BVDV-5'UTR<br>M31182.1 | F3                    | GCCATGCCCTTAGTAGGACT                                     |
|                        | B3                    | AGCACCTATCAGGCTGTA                                       |
|                        | FIP                   | CGAACCACTGACGACTACCCTGTTTTGGTAGCAACA<br>GTGGTGAGTT       |
|                        | BIP                   | AAGGTCTCGAGATGCCACGTGTTTTCTGCTTTTACCT<br>GGGCGAC         |
|                        | LF                    | 5'-Biotin-GGGCTTAAGCCATCCAACG                            |
|                        | LB                    | 5'-ROX-GGCATGCCCAAAGCACA                                 |
|                        | BRV-VP6<br>JN790188.1 | F3                                                       |
| B3                     |                       | CGCTGCAAGTTATCCTCC                                       |
| FIP                    |                       | ACAGATGTCACATTTGCTAGCATTTTTTCTGCAGTTT<br>GTGAATCAGTG     |
| BIP                    |                       | AGACAAGAATACGCGATACCAGTAGTTTTTTGATGG<br>TGAATAGTTAGTGATC |
| LF                     |                       | 5'-Biotin-GTTTCTCTAGCGTCGGCAAG                           |
| LB                     |                       | 5'-FAM-CCAGTTTTTCCCCCAGGTATG                             |
| BPV-VP2<br>JN191349.1  |                       | F3                                                       |
|                        | B3                    | GTCTTGCTGCGTTTTCCAAT                                     |
|                        | FIP                   | ATCCTACTCGCACGGCTCCCTTTTGCCTGGTGACC<br>ATGGTAAC          |
|                        | BIP                   | CTACGGGGGACAGCAACCAGTTTTGTCTTCTGCTG<br>CCGATG            |
|                        | LF                    | 5'-Biotin-GGAGACGTCTGCTCCGTTA                            |
|                        | LB                    | 5'-Digoxin-TGCTGAGACTGAGATACTCCG                         |

**Table S2.** Sequences of qPCR primers for detecting BVDV, BRV, and BPV.

| <b>Virus</b>           | <b>Primer</b>  | <b>Sequence (5' to 3')</b>           |
|------------------------|----------------|--------------------------------------|
| BVDV-5'UTR<br>M31182.1 | Forward Primer | AGGACTAGCATAATGAGG                   |
|                        | Reverse Primer | TCGAGACCTTTATTCCAA                   |
|                        | Probe          | 5'-FAM-CGAACCACTGACGACTACCCT-BQH1-3' |
| BRV-VP6<br>JN790188.1  | Forward Primer | GACTCACGCTTAGAATTG                   |
|                        | Reverse Primer | CGCGTATTCTTGTCTAAC                   |
|                        | Probe          | 5'-FAM-ATCAGTGCTTGCCGACGCTA-BQH1-3'  |
| BPV-VP2<br>JN191349.1  | Forward Primer | CTGAGACTGAGATACTCC                   |
|                        | Reverse Primer | CATCCACCATTCTTTGTAG                  |
|                        | Probe          | 5'-FAM-CATCGGCAGCAGAAGGACAAC-BQH1-3' |

**Table S3.** The informations of 156 animal sample.

| Sample Number | Test results |
|---------------|--------------|
| Sample 1      | -            |
| Sample 2      | -            |
| Sample 3      | -            |
| Sample 4      | -            |
| Sample 5      | -            |
| Sample 6      | -            |
| Sample 7      | -            |
| Sample 8      | -            |
| Sample 9      | -            |
| Sample 10     | -            |
| Sample 11     | +            |
| Sample 12     | -            |
| Sample 13     | -            |
| Sample 14     | -            |
| Sample 15     | -            |
| Sample 16     | -            |
| Sample 17     | -            |
| Sample 18     | -            |
| Sample 19     | +            |
| Sample 20     | -            |
| Sample 21     | -            |
| Sample 22     | -            |
| Sample 23     | -            |
| Sample 24     | -            |
| Sample 25     | +            |
| Sample 26     | -            |
| Sample 27     | -            |
| Sample 28     | +            |
| Sample 29     | +            |

|           |   |
|-----------|---|
| Sample 30 | - |
| Sample 31 | - |
| Sample 32 | - |
| Sample 33 | - |
| Sample 34 | - |
| Sample 35 | - |
| Sample 36 | - |
| Sample 37 | - |
| Sample 38 | + |
| Sample 39 | - |
| Sample 40 | - |
| Sample 41 | - |
| Sample 42 | - |
| Sample 43 | - |
| Sample 44 | - |
| Sample 45 | - |
| Sample 46 | + |
| Sample 47 | - |
| Sample 48 | + |
| Sample 49 | - |
| Sample 50 | - |
| Sample 51 | - |
| Sample 52 | - |
| Sample 53 | - |
| Sample 54 | - |
| Sample 55 | - |
| Sample 56 | - |
| Sample 57 | - |
| Sample 58 | - |
| Sample 59 | - |
| Sample 60 | - |
| Sample 61 | + |
| Sample 62 | - |
| Sample 63 | - |
| Sample 64 | - |
| Sample 65 | - |
| Sample 66 | - |
| Sample 67 | - |
| Sample 68 | - |
| Sample 69 | - |
| Sample 70 | - |
| Sample 71 | - |
| Sample 72 | - |
| Sample 73 | + |

|            |   |
|------------|---|
| Sample 74  | + |
| Sample 75  | - |
| Sample 76  | - |
| Sample 77  | - |
| Sample 78  | - |
| Sample 79  | - |
| Sample 80  | - |
| Sample 81  | - |
| Sample 82  | - |
| Sample 83  | - |
| Sample 84  | + |
| Sample 85  | - |
| Sample 86  | - |
| Sample 87  | - |
| Sample 88  | - |
| Sample 89  | - |
| Sample 90  | - |
| Sample 91  | - |
| Sample 92  | - |
| Sample 93  | - |
| Sample 94  | - |
| Sample 95  | - |
| Sample 96  | - |
| Sample 97  | - |
| Sample 98  | - |
| Sample 99  | - |
| Sample 100 | + |
| Sample 101 | - |
| Sample 102 | - |
| Sample 103 | - |
| Sample 104 | - |
| Sample 105 | - |
| Sample 106 | + |
| Sample 107 | - |
| Sample 108 | - |
| Sample 109 | - |
| Sample 110 | - |
| Sample 111 | - |
| Sample 112 | - |
| Sample 113 | - |
| Sample 114 | - |
| Sample 115 | - |
| Sample 116 | - |
| Sample 117 | + |

|            |   |
|------------|---|
| Sample 118 | + |
| Sample 119 | - |
| Sample 120 | - |
| Sample 121 | - |
| Sample 122 | - |
| Sample 123 | - |
| Sample 124 | - |
| Sample 125 | - |
| Sample 126 | - |
| Sample 127 | - |
| Sample 128 | - |
| Sample 129 | + |
| Sample 130 | + |
| Sample 131 | - |
| Sample 132 | - |
| Sample 133 | - |
| Sample 134 | - |
| Sample 135 | - |
| Sample 136 | - |
| Sample 137 | - |
| Sample 138 | - |
| Sample 139 | - |
| Sample 140 | - |
| Sample 141 | - |
| Sample 142 | - |
| Sample 143 | - |
| Sample 144 | - |
| Sample 145 | - |
| Sample 146 | - |
| Sample 147 | - |
| Sample 148 | - |
| Sample 149 | + |
| Sample 150 | - |
| Sample 151 | - |
| Sample 152 | - |
| Sample 153 | - |
| Sample 154 | - |
| Sample 155 | - |
| Sample 156 | - |

---

**Table S4.** Comparison of molecular methods for detection of porcine diarrhea virus.

| Techniques                                                                      | Detection object                 | Reaction time | LOD                                                                                                                                    | Reference  |
|---------------------------------------------------------------------------------|----------------------------------|---------------|----------------------------------------------------------------------------------------------------------------------------------------|------------|
| CRISPR-LwCas13a                                                                 | BVDV                             | 30 min        | 10 <sup>3</sup> pM                                                                                                                     | [1]        |
| HCR-AuNP colorimetric assay                                                     | BVDV                             | 120 min       | 0.008 TCID <sub>50</sub>                                                                                                               | [2]        |
| DPO-nanoPCR                                                                     | BRV, BPV, BVDV                   | 75 min        | BRV: 9.40×10 <sup>2</sup> copies/μL; BPV: 5.14×10 <sup>3</sup> copies/μL;<br>BVDV: 4.09×10 <sup>1</sup> copies/μL                      | [3]        |
| multiplex real-time fluorescent quantitative PCR                                | BVDV, BRV, BCoV                  | 50 min        | BVDV: 1.19×10 <sup>2</sup> copies/μL; BRV: 3.89×10 <sup>1</sup> copies/μL;<br>BCoV: 3.74×10 <sup>1</sup> copies/μL                     | [4]        |
| Real-time RT-PCR assay                                                          | BVDV                             | 75 min        | 5.2 RNA molecules per reaction                                                                                                         | [5]        |
| multiplex real-time fluorescence-based quantitative PCR assay                   | BToV, BEV, BNoV, BCoV, BRV, BVDV | 35 min        | BNoV: 1.91 copies/μL; BEV: 96.0 copies/μL;<br>BToV: 12.8 copies/μL; BRV: 16.4 copies/μL;<br>BCoV: 18.2 copies/μL; BVDV: 65.3 copies/μL | [6]        |
| multiplex droplet digital PCR                                                   | BEV, BCoV, BRV                   | 83 min        | BEV: 2.7 copies/μL; BCoV: 1 copies/μL;<br>BRV: 2.4 copies/μL                                                                           | [7]        |
| TaqMan real-time PCR                                                            | BVDV, BoHV-1, BPIV3, BRSV, IDV   | 40 min        | 100 copies/μL for each virus                                                                                                           | [8]        |
| cross-linking and non-crosslinking probe-gold nanoparticle hybridization assays | BVDV                             | 40 min        | CL: 6.83 ng/reaction;<br>NCL: 44.36 ng/reaction                                                                                        | [9]        |
| RT-LAMP                                                                         | BVDV                             | 40 min        | About 70 PFU/mL                                                                                                                        | [10]       |
| RT-RPA combined with LFD                                                        | BVDV, BPIV3                      | 25 min        | BVDV: 50 RNA molecules per reaction;<br>BPIV3: 34 RNA molecules per reaction                                                           | [11]       |
| RPA                                                                             | BVDV, BoHV-1                     | 30 min        | BVDV, BoHV-1: 1×10 <sup>1</sup> copies/μL                                                                                              | [12]       |
| Triple LAMP-LFD                                                                 | BVDV, BRV, BPV                   | 30 min        | BVDV: 2.62×10 <sup>1</sup> copies/μL; BRV: 2.43×10 <sup>1</sup> copies/μL;<br>BPV: 2.50×10 <sup>1</sup> copies/μL                      | This Study |

## References

1. Yao, R., et al., *CRISPR-Cas13a-Based Detection for Bovine Viral Diarrhea Virus*. *Front Vet Sci*, 2021. **8**: p. 603919.
2. Ghasemi Monjezi, S., et al., *Enzyme-free amplification and detection of bovine viral diarrhea virus RNA using hybridization chain reaction and gold nanoparticles*. *Appl Microbiol Biotechnol*, 2016. **100**(20): p. 8913-21.
3. Wang, M., et al., *Simultaneous Detection of Bovine Rotavirus, Bovine Parvovirus, and Bovine Viral Diarrhea Virus Using a Gold Nanoparticle-Assisted PCR Assay With a Dual-Priming Oligonucleotide System*. *Front Microbiol*, 2019. **10**: p. 2884.
4. Chang, L.Y., et al., *Establishment and Preliminary Application of Multiplex Fluorescent Quantitative PCR for Simultaneous Detection of BVDV, BRV and BCV*. *Indian Journal of Animal Research*, 2021. **55**(10): p. 1141-1149.
5. Hou, P., et al., *Detection of bovine viral diarrhea virus genotype 1 in aerosol by a real time RT-PCR assay*. *BMC Vet Res*, 2020. **16**(1): p. 114.
6. Meng, W.X., et al., *A multiplex real-time fluorescence-based quantitative PCR assay for calf diarrhea viruses*. *Frontiers in Microbiology*, 2024. **14**.
7. Chen, J.Z., et al., *Establishment and application of multiplex droplet digital polymerase chain reaction assay for bovine enterovirus, bovine coronavirus, and bovine rotavirus*. *Frontiers in Veterinary Science*, 2023. **10**.
8. Zhang, J., et al., *Development of a One-Step Multiplex Real-Time PCR Assay for the Detection of Viral Pathogens Associated With the Bovine Respiratory Disease Complex*. *Front Vet Sci*, 2022. **9**: p. 825257.
9. Heidari, Z., S.E. Rezaatofghi, and S. Rastegarzadeh, *Development and comparison of cross-linking and non-crosslinking probe-gold nanoparticle hybridization assays for direct detection of unamplified bovine viral diarrhea virus-RNA*. *BMC Biotechnol*, 2021. **21**(1): p. 30.
10. Tajbakhsh, A., et al., *A reverse transcriptase-loop mediated isothermal amplification assay (RT-LAMP) for rapid detection of bovine viral diarrhea virus 1 and 2*. *Archives of Razi Institute*, 2017. **72**(2): p. 73-81.
11. Yang, S., et al., *A lateral flow dipstick combined with reverse transcription recombinase polymerase amplification for rapid and visual detection of the BVDV and BPIV3*. *J Virol Methods*, 2022. **299**: p. 114343.
12. Jiang, L., et al., *Simultaneous detection of bovine viral diarrhea virus (BVDV) and bovine herpesvirus 1 (BoHV-1) using recombinase polymerase amplification*. *Sci Rep*, 2024. **14**(1): p. 10169.
